# Supplementary material for: Silver assisted stereo-directed assembly of branched peptide nucleic acids into four-point nanostars
Source: Royal Society of Chemistry journal article supplement (doi:10.1039/d0nr05471b), 2020-01-01

*Supplementary Information*

**Silver Assisted Stereo-Directed Assembly of Branched Peptide Nucleic  
Acids into Four-Point Nanostars**

Bharath Raj Madhanagopal,<sup>a</sup> Jatish Kumar<sup>a</sup> and Krishna N Ganesh<sup>\*a,b</sup>,

<sup>a</sup>Indian Institute of Science Education and Research (IISER) Tirupati, Karkambadi Road,  
Tirupati 517507, Andhra Pradesh, India

<sup>b</sup>Indian Institute of Science Education and Research (IISER) Pune, Dr Homi Bhabha Road,  
Pune 411008, Maharashtra, India

\*To whom correspondence should be addressed: kn.ganesh@iisertirupati.ac.in

| Content                                                                                                     | Page No. |
|-------------------------------------------------------------------------------------------------------------|----------|
| Scheme S1. Synthesis of <i>br</i> -PNA <b>3</b>                                                             | 2        |
| Table S1. HPLC and MALDI characterization data of PNA <b>1-3</b>                                            | 2        |
| Figure S1. Structure of <i>br</i> (4 <i>S</i> )-PNA <b>1</b>                                                | 3        |
| Figure S2. Structure of <i>br</i> (4 <i>R</i> )-PNA <b>2</b>                                                | 4        |
| Figure S3. Structure of <i>br</i> -PNA <b>3</b>                                                             | 5        |
| Figure S4. Circular dichroism spectra of branched <i>br</i> -PNA <b>3</b>                                   | 6        |
| Figure S5. Circular dichroism spectra of branched <i>br</i> -PNA <b>1</b> and <b>2</b> as a function of pH  | 6        |
| Figure S6. FESEM images of <i>br</i> -PNAs <b>1-3</b> before addition of AgNO <sub>3</sub>                  | 7        |
| Figure S7. FESEM image of self-assembled structures of <i>br</i> -PNAs <b>1</b> at higher PNA concentration | 7        |
| Figure S8. EDX spectra of nanostars formed by <i>br</i> (4 <i>S</i> )-PNA <b>1</b>                          | 8        |
| Figure S9. HPLC chromatograms of <i>br</i> -PNAs <b>1-3</b>                                                 | 9        |
| Figure S10. MALDI-TOF spectra of <i>br</i> -PNAs <b>1-3</b>                                                 | 10-11    |

### Scheme S1. Solid phase synthesis of *br*-PNA 3

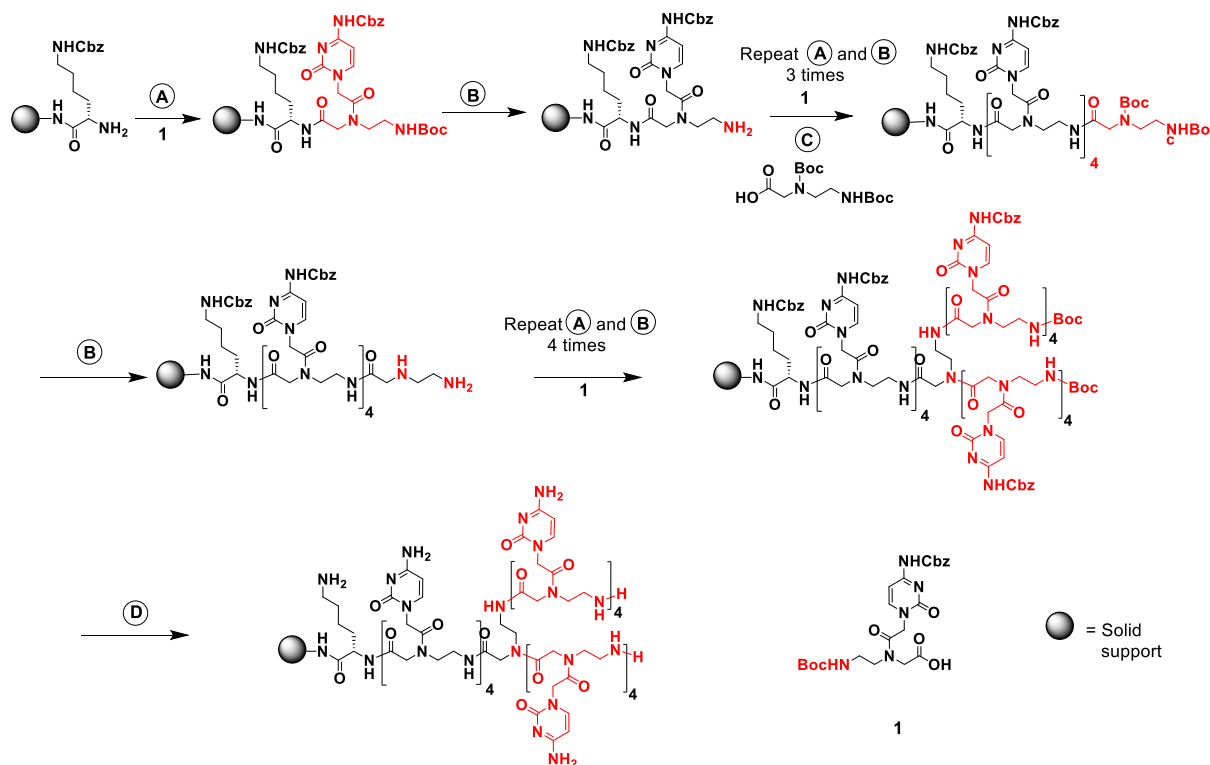

(A) Coupling: PNA-C monomer **1**, HOBt, HBTU, and DIEA. (B) 1. Boc deprotection, 50% TFA; 2. Neutralization, 5 % DIEA. (C) Coupling: *aeg* monomer, HOBt, HBTU, and DIEA. (D) TFA, TFMSA, and thioanisole.

**Table S1.** MALDI and HPLC characterization of PNAs

| PNA                                                                                                   | Molecular Formula                                                 | Calc Mass | Obsd Mass                      | Retention Time (min) |
|-------------------------------------------------------------------------------------------------------|-------------------------------------------------------------------|-----------|--------------------------------|----------------------|
| <i>br</i> (4 <i>S</i> )-PNA <b>1</b><br>(4 <i>S</i> )- <i>Amp</i> -(PNA C <sub>4</sub> ) <sub>3</sub> | C <sub>131</sub> H <sub>179</sub> N <sub>65</sub> O <sub>38</sub> | 3272.29   | 3295.77<br>[M+Na] <sup>+</sup> | 12.60                |
| <i>br</i> (4 <i>R</i> )-PNA <b>2</b><br>(4 <i>R</i> )- <i>Amp</i> -(PNA C <sub>4</sub> ) <sub>3</sub> | C <sub>131</sub> H <sub>179</sub> N <sub>65</sub> O <sub>38</sub> | 3272.29   | 3273.18<br>[M+H] <sup>+</sup>  | 12.75                |
| <i>br</i> -PNA <b>3</b><br><i>aeg</i> -(PNA C <sub>4</sub> ) <sub>3</sub>                             | C <sub>130</sub> H <sub>179</sub> N <sub>65</sub> O <sub>38</sub> | 3260.28   | 3262.01<br>[M+H] <sup>+</sup>  | 11.4                 |

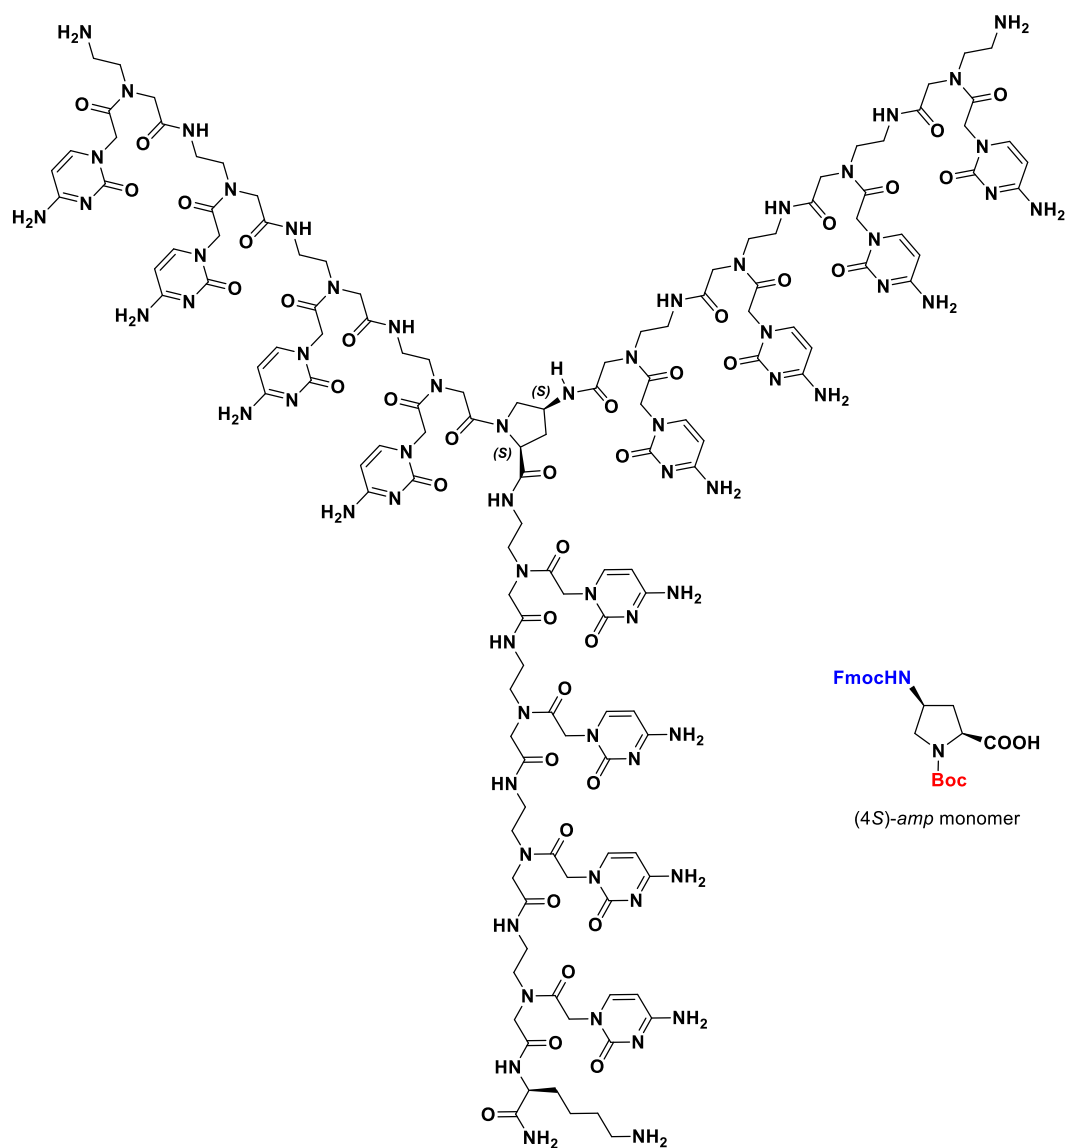

**Figure S1.** Structure of *br*(4*S*)-PNA 1 and (4*S*)-*Amp* monomer

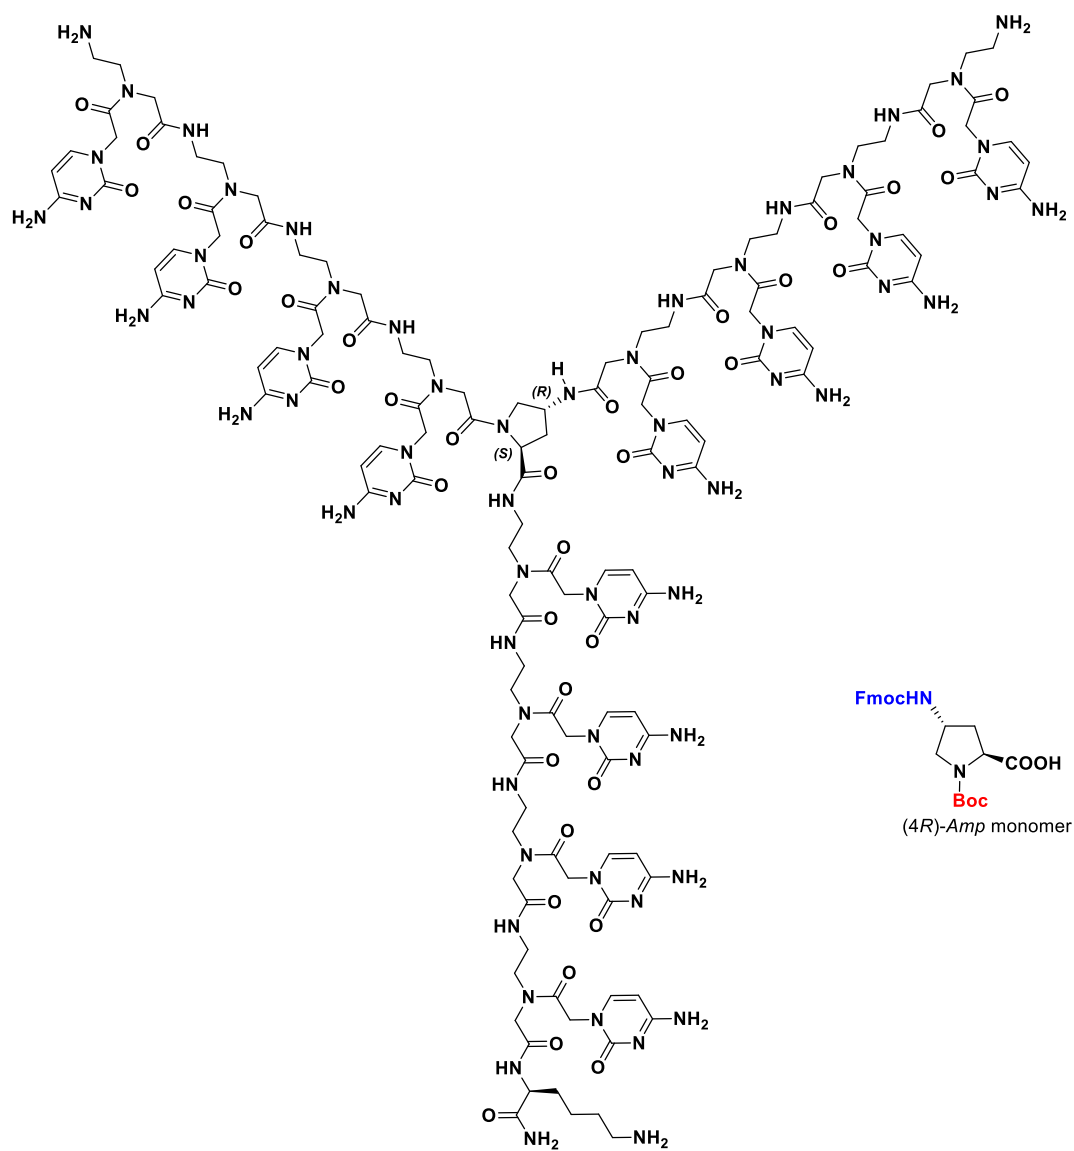

**Figure S2.** Structure of *br(4R)*-PNA **2** and (4*R*)-Amp monomer

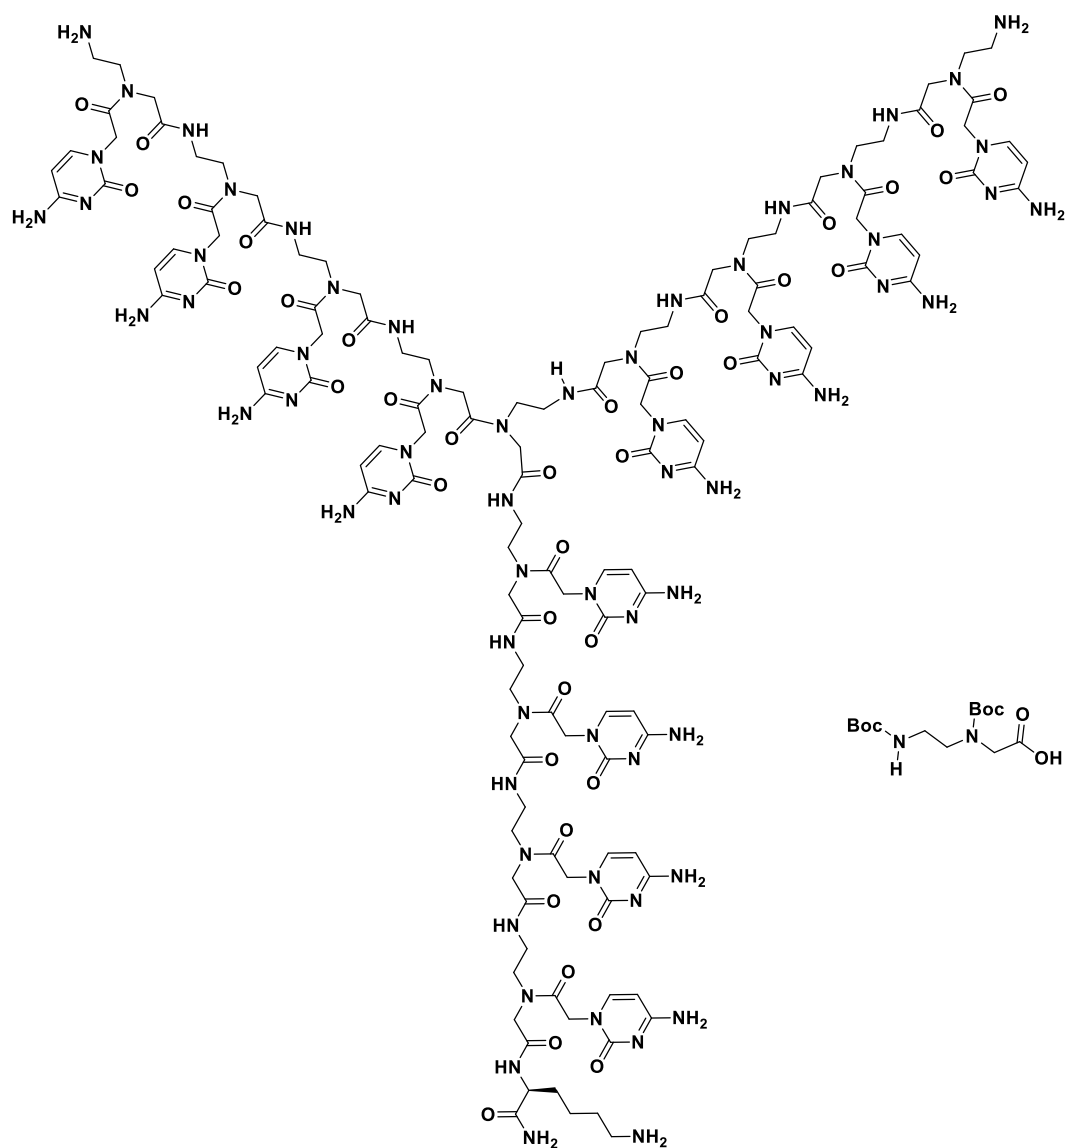

**Figure S3.** Structure of *br*-PNA **3** and *aeg* monomer

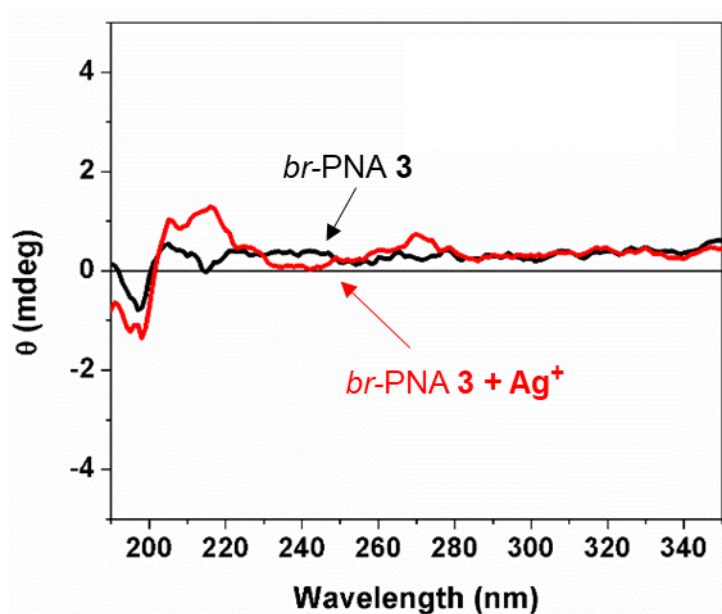

**Figure S4.** CD spectra of branched *br*-PNA **3** before (black trace) and after the addition of silver nitrate (red trace) in water. The concentration ratio of  $[C]:[Ag^+]$  was maintained at 1:1.

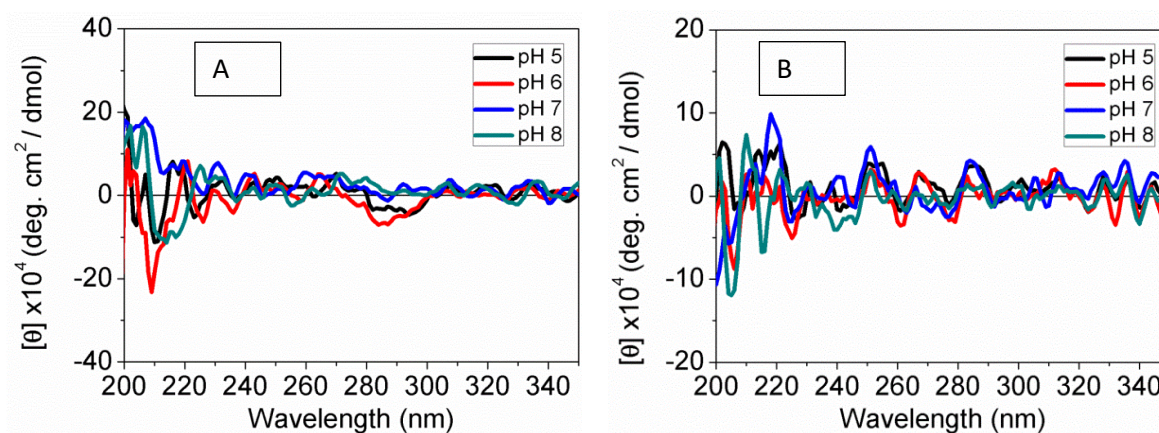

**Figure S5:** Circular dichroism spectra of branched PNAs as a function of pH. (A) *br*(4S)-PNA **1** and (B) *br*(4R)-PNA **2** in 10 mM phosphate buffered saline at pH 5-8.

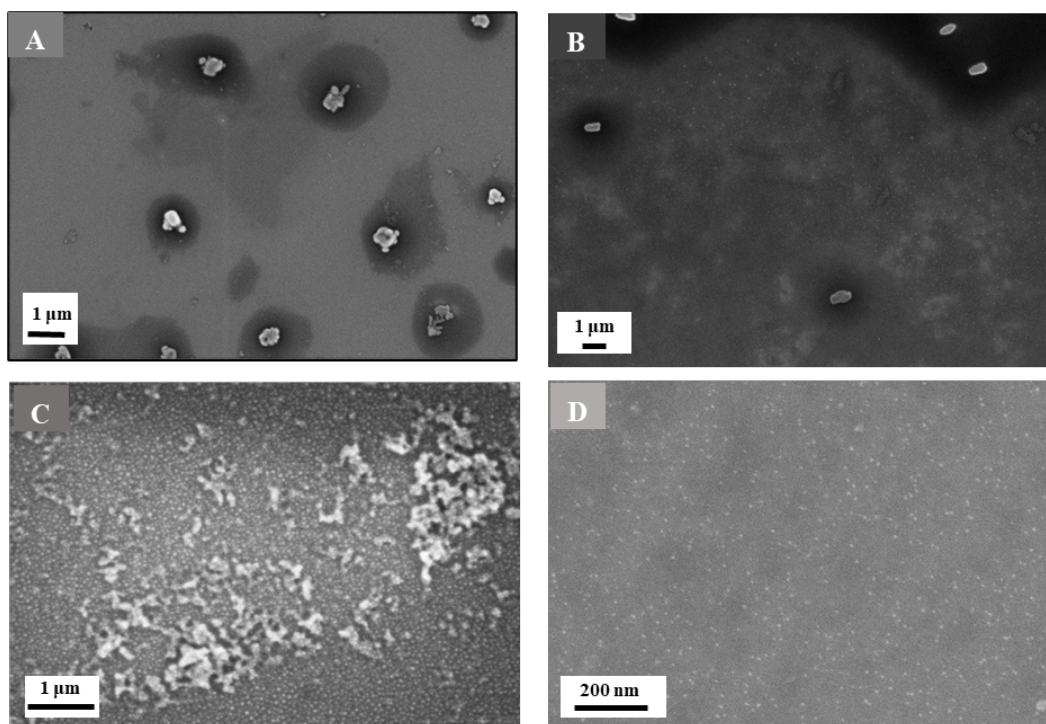

**Figure S6.** FESEM images of branched PNAs before addition of  $\text{AgNO}_3$  in water. A) *br(4S)*-PNA 1, B) *br(4S)*-PNA 2, C) *br*-PNA 3.  $[\text{C}] = 2 \text{ mM}$ . (D) FESEM image of only  $\text{AgNO}_3$  solution (2 mM) in water.

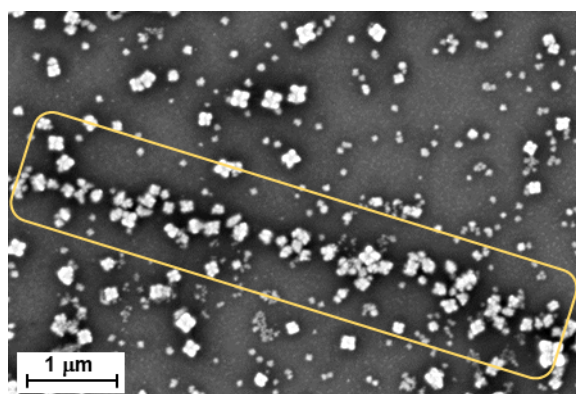

**Figure S7.** Aggregation of nanostars of *br(4S)*-PNA 1 with silver ions in water at  $[\text{C}]: [\text{Ag}^+]$  of 2.5 mM: 2.0 mM. Incubation period was 12 h.

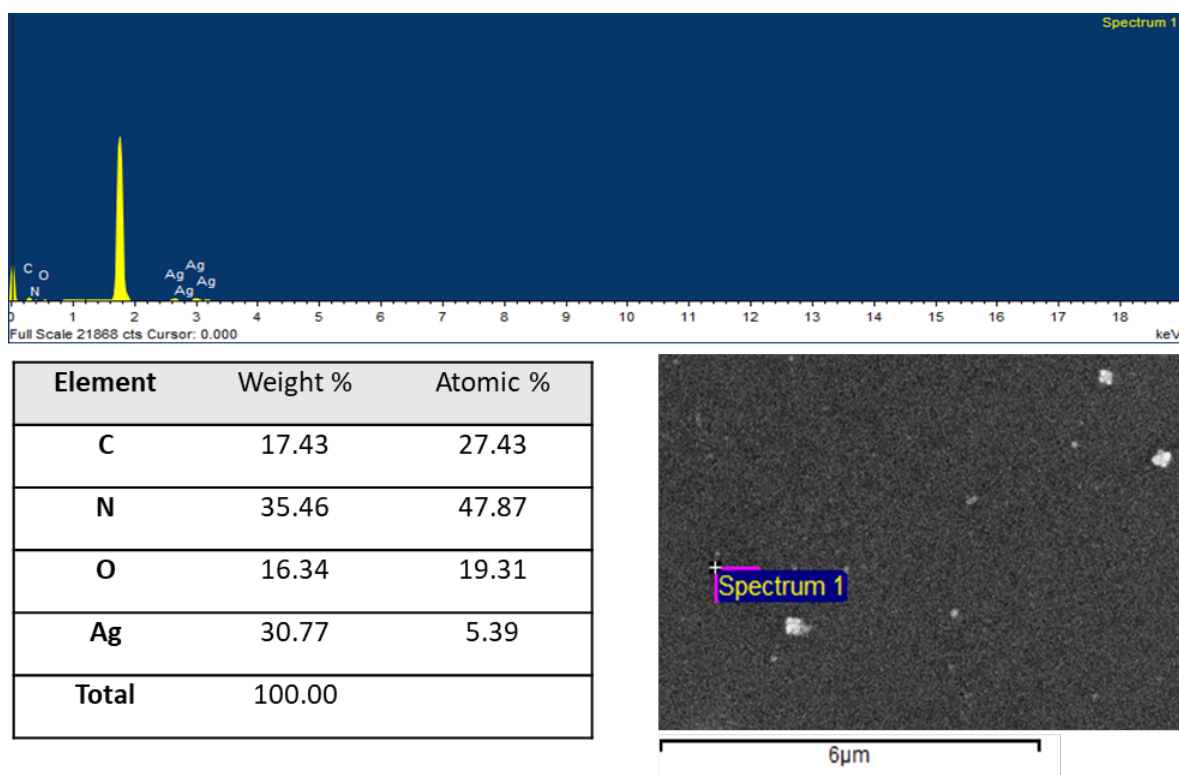

**Figure S8.** EDX spectra showing the elemental composition of nanostar-like morphology formed by *br(4S)*-PNA **1** with silver ions in water at [C]: [Ag<sup>+</sup>] of 2.0 mM: 2.0 mM.



HPLC profile of *br*(4*S*)-PNA 1

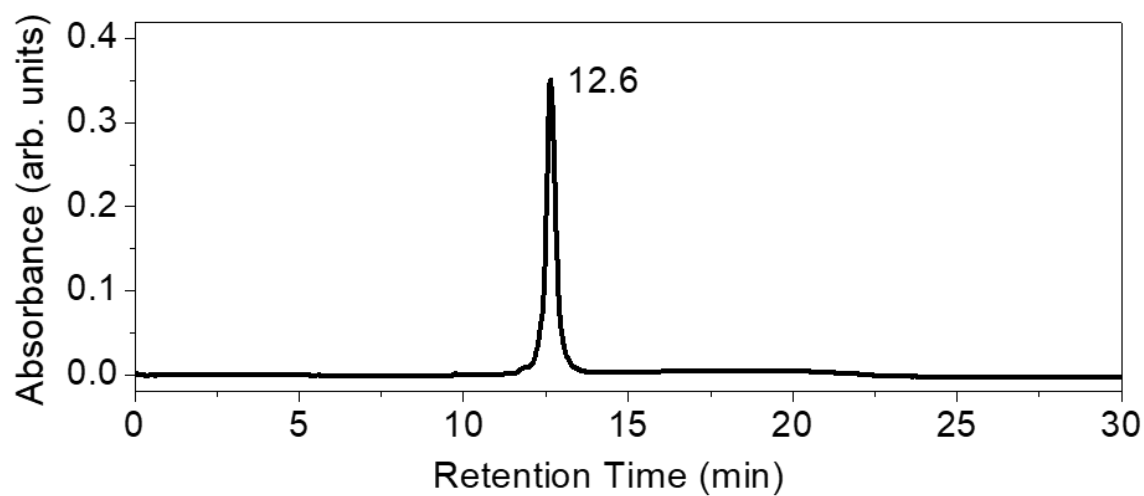

HPLC chromatogram of *br*(4*R*)-PNA 2

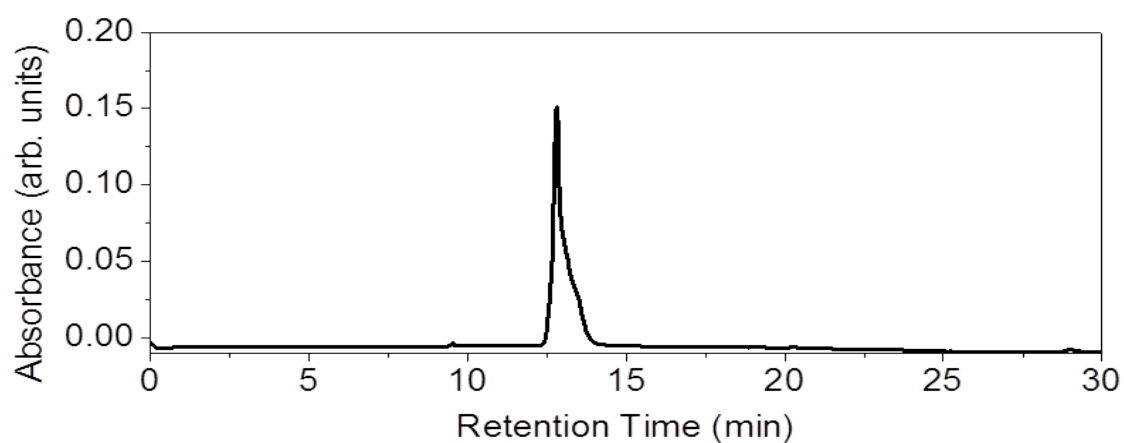

HPLC chromatogram of *br*-PNA 3

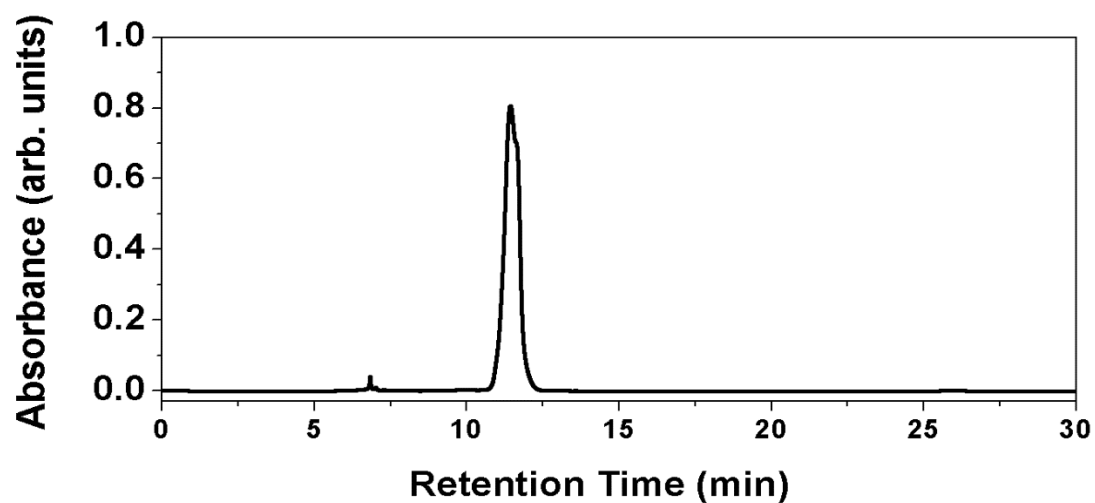

MALDI-TOF spectrum of *br*(4*S*)-PNA 1

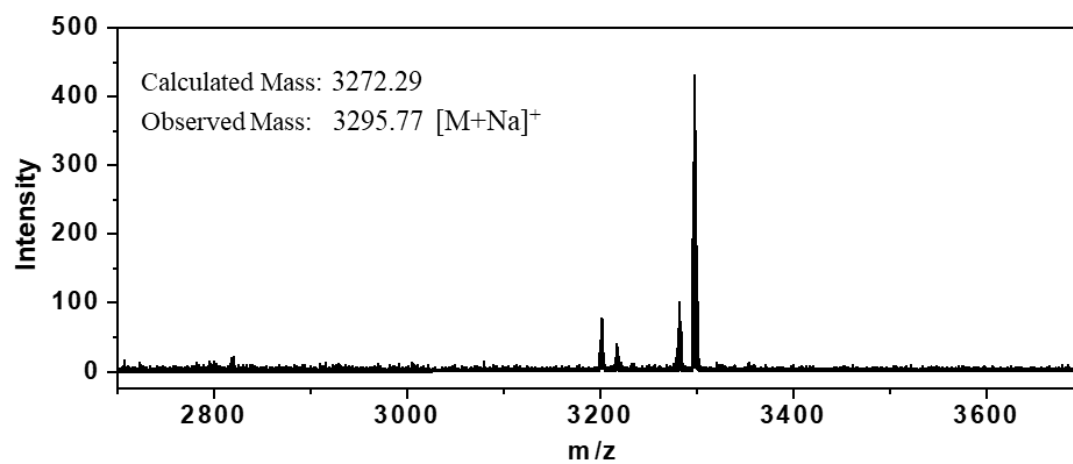

MALDI-TOF Spectrum of *br*(4*R*)-PNA 2

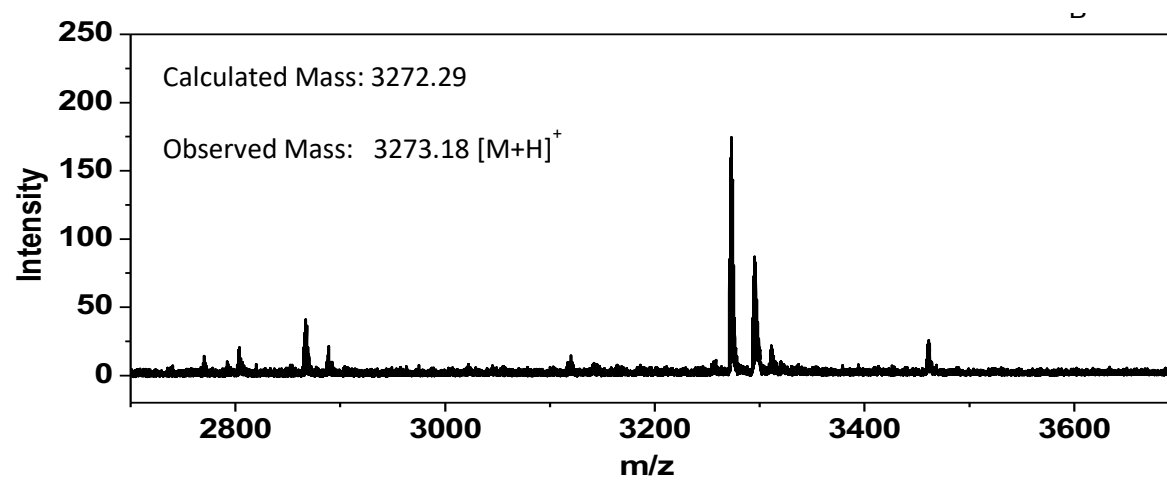

# MALDI-TOF spectrum of *br*-PNA 3

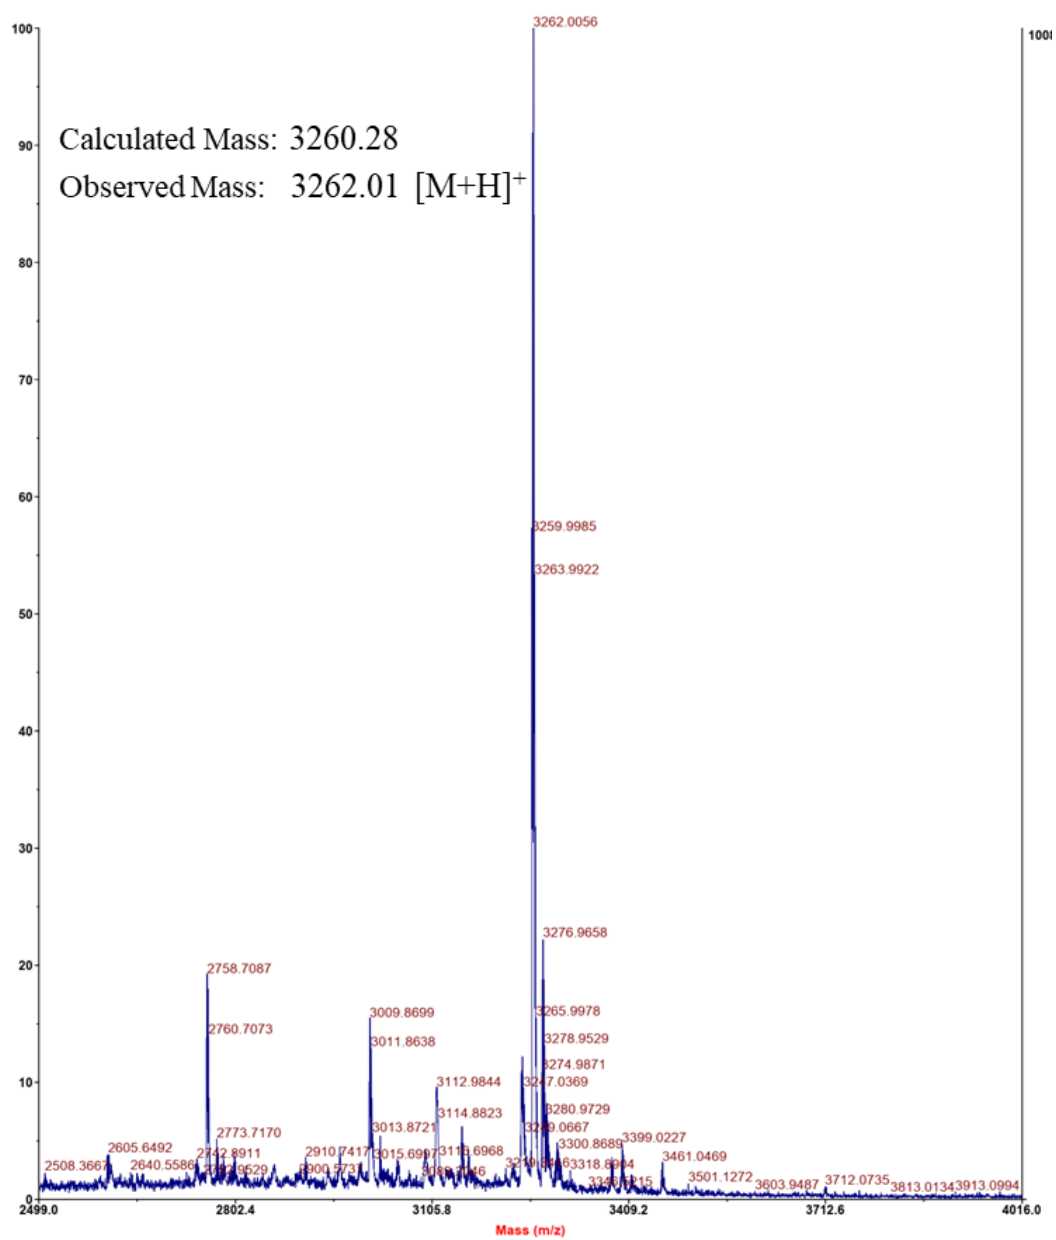

Supplement: d0nr05471b1.pdf [file d0nr05471b1.pdf]
